# Supplementary material for: Volatile metabolites differentiate air–liquid interface cultures after infection with Staphylococcus aureus
Source: Royal Society of Chemistry journal article supplement (doi:10.1039/d2an01205g), 2023-01-01
Supplement: d2an01205g1.pdf [file d2an01205g1.pdf]

## Supplementary information

### Volatile metabolites differentiate air-liquid interface cultures after infection with *Staphylococcus aureus*

Waqar Ahmed<sup>1</sup>, Emmanuelle Bardin<sup>2,3</sup>, Michael D Davis<sup>4</sup>, Isabelle Sermet-Gaudelus<sup>2,5</sup>, Stanislas Grassin Delyle<sup>3,6</sup>, Stephen Fowler<sup>1,7</sup>

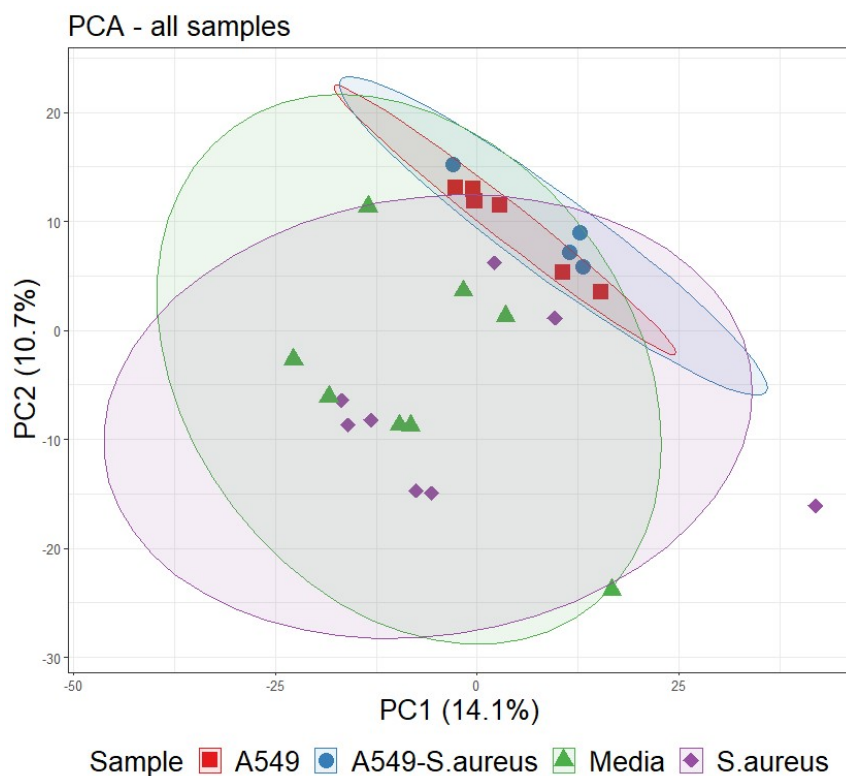

S1. PCA scores plot showing samples from infected cells, uninfected cells, media and *S. aureus*.

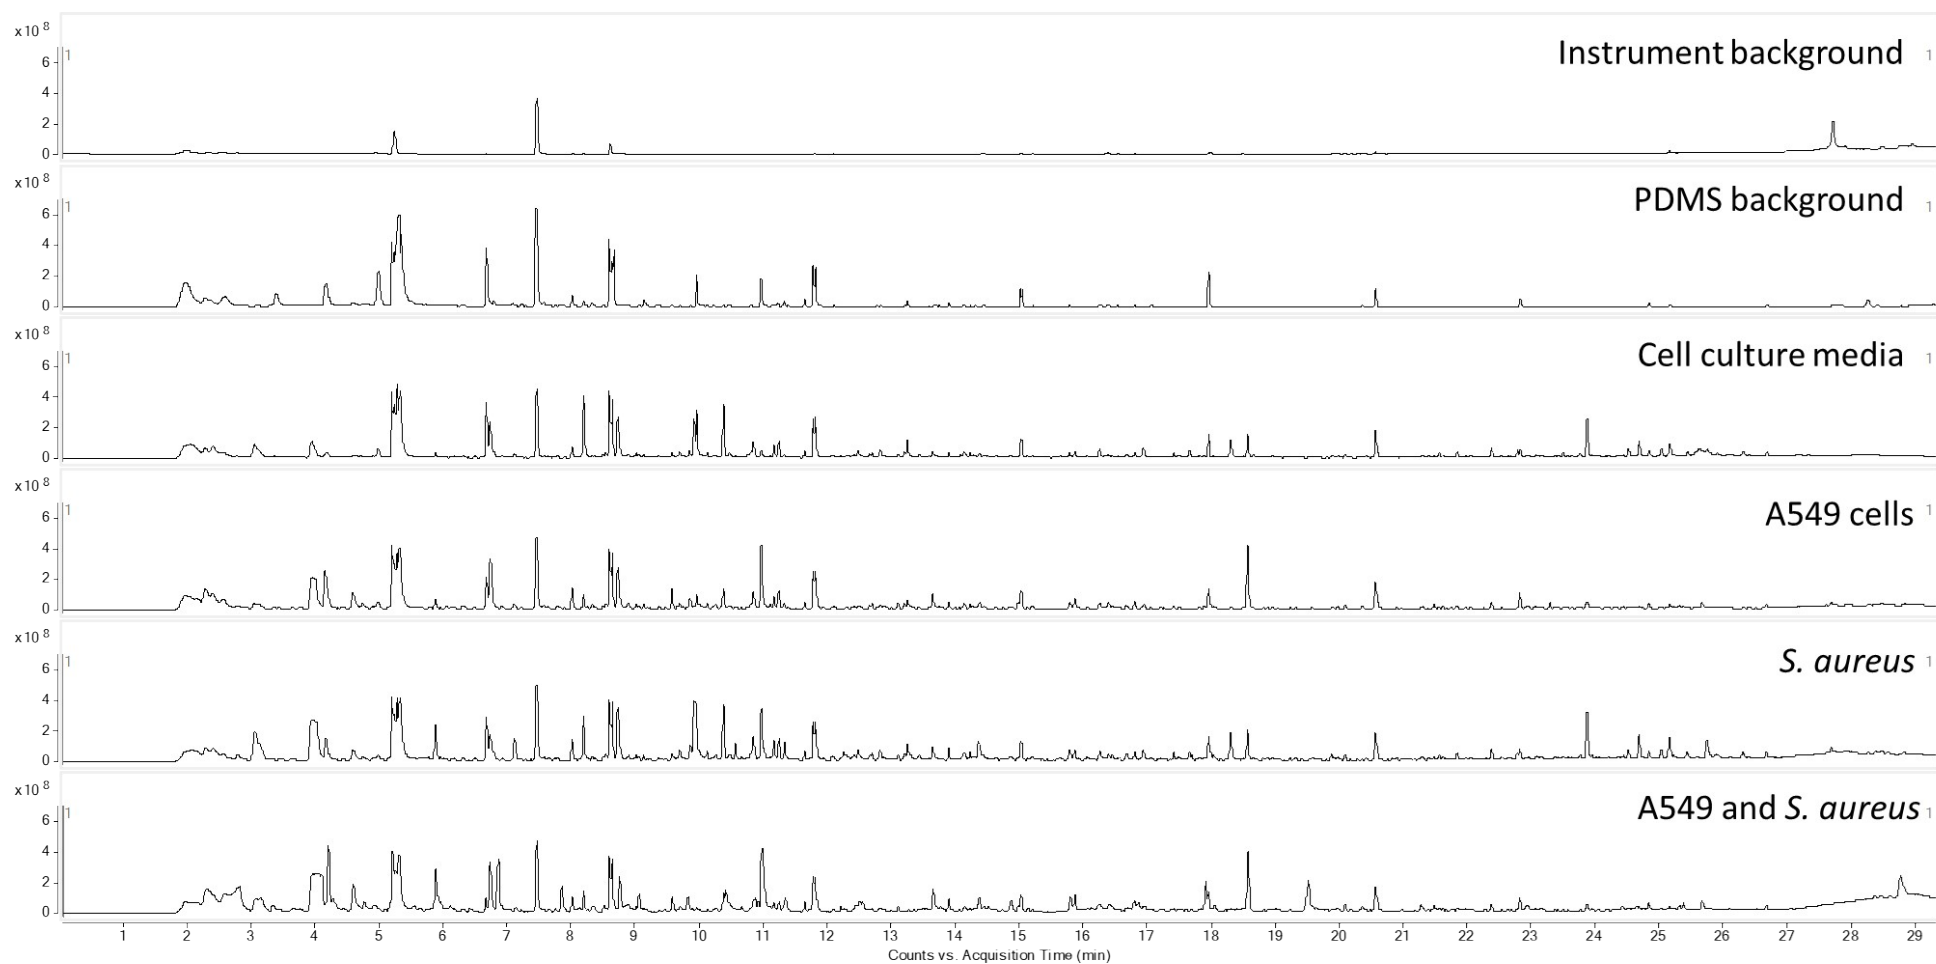

S2. Examples of total ion current chromatograms of samples, in order from top to bottom: instrument background (trap and column artefacts), PDMS sorbent material background, cell culture media (DMEM), A549 cells under normal growth conditions, *S. aureus* cultured in DMEM, and A549 cells infected with *S. aureus*.

DF 1

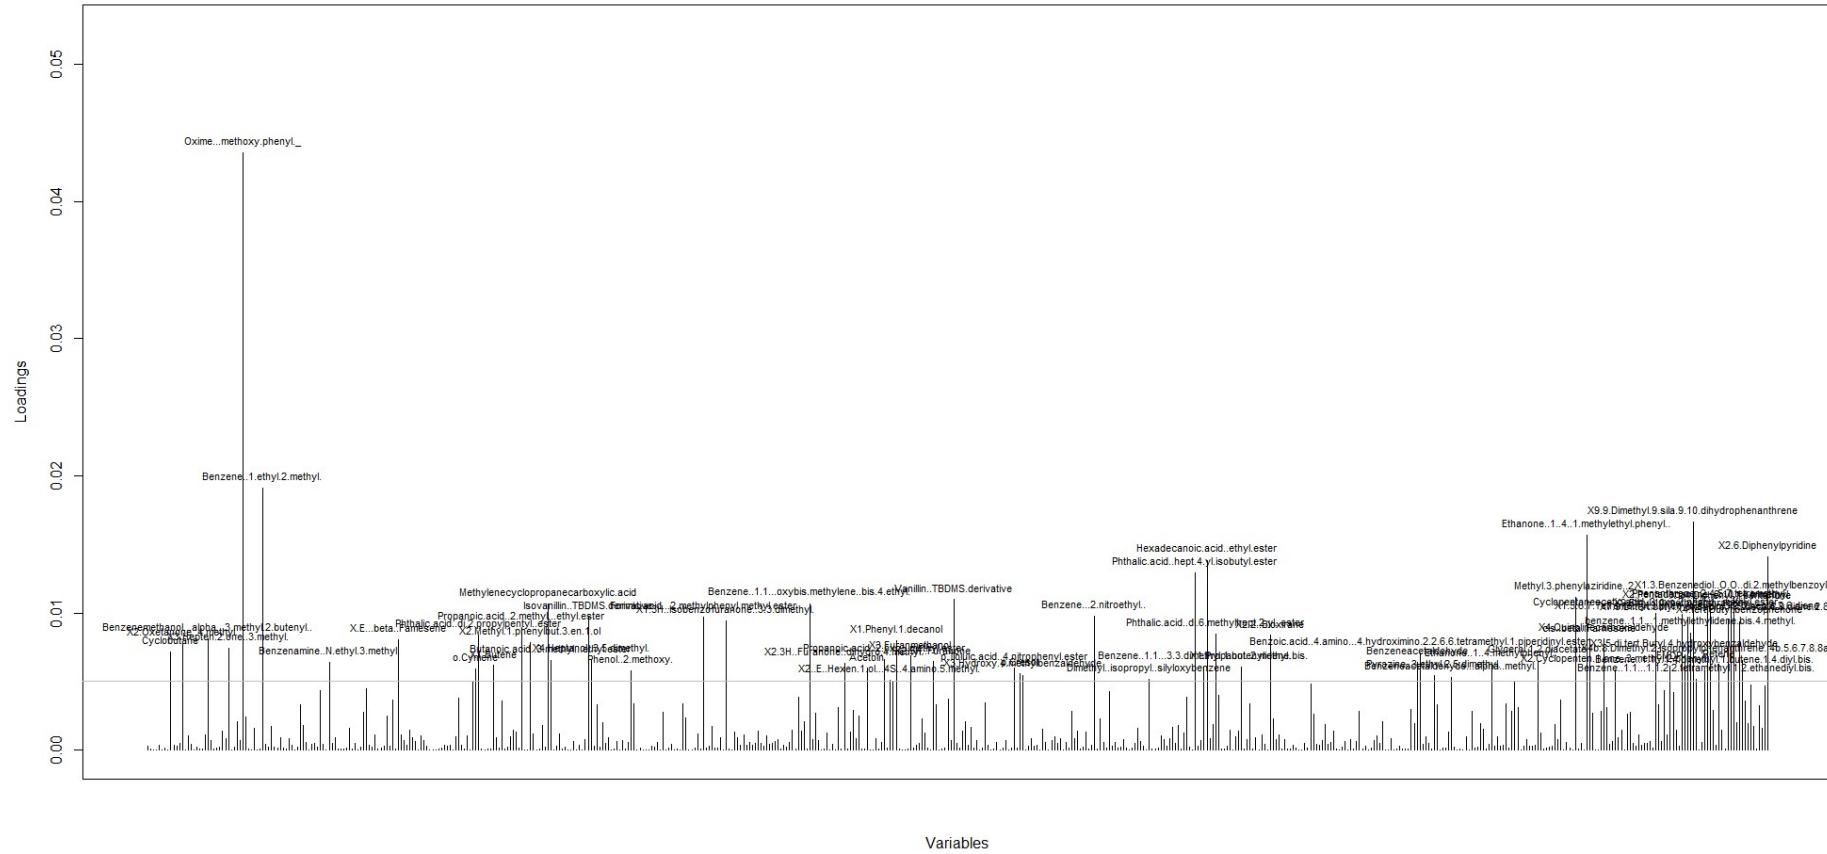

S3. PC-DFA loadings from the first discriminant function.



Table S1. List of VOCs extracted from PC-DFA (DF2) with NIST library references (where applicable)

| VOC name (NIST ID)                                  | RT (min) | NIST Library RI | Estimated RI | NIST Library RI reference                       |
|-----------------------------------------------------|----------|-----------------|--------------|-------------------------------------------------|
| Triethylamine                                       | 3.441    | 711             | 693          | Estevez, Ventanas, et al., 2005                 |
| 2-Propenoic acid                                    | 3.813    | NA              | 721          | NA                                              |
| Propanoic acid                                      | 3.824    | NA              | 722          | NA                                              |
| 2,2'-Bioxirane                                      | 3.939    | NA              | 729          | NA                                              |
| Disulfide, dimethyl                                 | 4.102    | 722             | 740          | Takeoka, Perrino, et al., 1996                  |
| Ethanamine, 2-chloro-N,N-dimethyl-                  | 4.29     | 750             | 753          | Jagadeshwar Reddy, Prabhakar, et al., 2006      |
| 2-Propenoic acid, 2-methyl-                         | 4.633    | 711             | 776          | Meynier, Novelli, et al., 1999                  |
| Acetyl valeryl                                      | 5.562    | 816             | 830          | Wu, Liou, et al., 1987                          |
| Formic acid hydrazide                               | 5.943    | NA              | 849          | NA                                              |
| Butanoic acid, 2-methyl-                            | 6.312    | 894             | 868          | Alissandrakis E., Tarantilis P.A., et al., 2007 |
| 1-Butanol, 3-methyl-, acetate                       | 6.417    | 867             | 874          | Takeoka, Buttery, et al., 1992                  |
| Cyclopent-4-ene-1,3-dione                           | 6.465    | 880             | 876          | Kim and Chung, 2009                             |
| 4-Heptanol, 3,5-dimethyl-                           | 8.15     | NA              | 958          | NA                                              |
| Furaneol                                            | 10.113   | 1097            | 1052         | Jarunrattanasri, Theerakulkait, et al., 2007    |
| Phenylethyl Alcohol                                 | 11.359   | 1086            | 1112         | Hoskovec, Grygarová, et al., 2005               |
| 4H-Pyran-4-one, 2,3-dihydro-3,5-dihydroxy-6-methyl- | 11.969   | 1134            | 1143         | da Silva, Borba, et al., 1999                   |
| Dehydromevalonic lactone                            | 12.223   | 1169            | 1155         | Andriamaharavo, 2014                            |
| 2-Isobutyl-4-methylpyridine                         | 12.272   | 1154            | 1158         | Machiels, van Ruth, et al., 2003                |
| 3-(2-Hydroxyethyl)-2-oxazolidinone                  | 12.295   | NA              | 1159         | NA                                              |
| Decanal                                             | 13.218   | 1200            | 1205         | Asuming, Beauchamp, et al., 2005                |
| Benzenepropanenitrile                               | 13.821   | 1243            | 1237         | Andriamaharavo, 2014                            |
| Benzoic acid, 2-hydroxy-, ethyl ester               | 14.45    | 1249            | 1270         | Tudor and Moldovan, 1999                        |
| Indole                                              | 14.883   | 1292            | 1293         | Dickens, 1999                                   |
| Benzoic acid, 4-chloro-                             | 15.691   | NA              | 1337         | NA                                              |
| n-Decanoic acid                                     | 16.115   | 1387            | 1361         | Alissandrakis E., Tarantilis P.A., et al., 2007 |
| Benzeneacetamide                                    | 16.798   | 1412            | 1399         | Andriamaharavo, 2014                            |

|                                                                             |        |      |      |                                   |
|-----------------------------------------------------------------------------|--------|------|------|-----------------------------------|
| cis-.beta.-Farnesene                                                        | 17.705 | 1446 | 1453 | Lucero, Fredrickson, et al., 2006 |
| 2(3H)-Furanone, 5-hexyldihydro-                                             | 17.92  | 1463 | 1465 | Asuming, Beauchamp, et al., 2005  |
| Cyclohexane, 1-ethenyl-1-methyl-2-(1-methylethenyl)-4-(1-methylethylidene)- | 19.492 | 1492 | 1562 | Yu, Liao, et al., 2007            |
| Dodecanoic acid                                                             | 19.53  | 1562 | 1564 | Maia, Andrade, et al., 2000       |
| Pyridine, 3-methyl-2-phenyl-                                                | 20.085 | 1513 | 1598 | Rostad and Pereira, 1986          |
| Pyridine, 2-hexyl-                                                          | 24.792 | NA   | 1915 | NA                                |
| Pyrrolo[1,2-a]pyrazine-1,4-dione, hexahydro-3-(2-methylpropyl)-             | 24.88  | 1908 | 1921 | Xu, Han, et al., 2012             |
| Octadecanoic acid                                                           | 27.688 | 2170 | 2111 | Maia, Andrade, et al., 2000       |
